# Supplementary material
Source: PubMed Central journal article supplement (PMC6014706)
Supplement: EHP2466.s001.acco.pdf [file EHP2466.s001.acco.pdf]

**Note to readers with disabilities:** *EHP* strives to ensure that all journal content is accessible to all readers. However, some figures and Supplemental Material published in *EHP* articles may not conform to [508 standards](#) due to the complexity of the information being presented. If you need assistance accessing journal content, please contact [ehp508@niehs.nih.gov](mailto:ehp508@niehs.nih.gov). Our staff will work with you to assess and meet your accessibility needs within 3 working days.

### **Supplemental Material**

#### **Long-Term Exposure to Fine Particulate Matter, Blood Pressure, and Incident Hypertension in Taiwanese Adults**

Zilong Zhang, Cui Guo, Alexis K.H. Lau, Ta-Chien Chan, Yuan Chieh Chuang, Changqing Lin, Wun Kai Jiang, Eng-kiong Yeoh, Tony Tam, Kam S. Woo, Bryan P. Yan, Ly-yun Chang, Martin C.S. Wong, and Xiang Qian Lao

#### **Table of Contents**

**Table S1.** Sensitivity analyses on associations between long-term exposure to PM<sub>2.5</sub> and blood pressure in Taiwanese adults at baseline.

**Table S2.** Sensitivity analysis on associations between long-term exposure to PM<sub>2.5</sub> and incident hypertension in Taiwanese adults.

Table S1 Sensitivity analyses on associations between long-term exposure to PM<sub>2.5</sub> and blood pressure in Taiwanese adults at baseline

|                                               | Crude Model      |          | Adjusted Model 1 |          | Adjusted Model 2 |          | Adjusted Model 3 |          |
|-----------------------------------------------|------------------|----------|------------------|----------|------------------|----------|------------------|----------|
|                                               | Coef (95% CI)    | <i>P</i> |
| Participants using home address (N=298,965)   |                  |          |                  |          |                  |          |                  |          |
| Systolic blood pressure                       | 0.69 (0.61,0.77) | <0.001   | 0.54 (0.47,0.61) | <0.001   | 0.48 (0.41,0.55) | <0.001   | 0.46 (0.40,0.51) | <0.001   |
| Diastolic blood pressure                      | 0.25 (0.19,0.30) | <0.001   | 0.17 (0.13,0.22) | <0.001   | 0.14 (0.10,0.19) | <0.001   | 0.13 (0.09,0.17) | <0.001   |
| Pulse pressure                                | 0.44 (0.39,0.50) | <0.001   | 0.37 (0.31,0.42) | <0.001   | 0.34 (0.28,0.39) | <0.001   | 0.33 (0.28,0.38) | <0.001   |
| Healthy participants (N=193,897) <sup>a</sup> |                  |          |                  |          |                  |          |                  |          |
| Systolic blood pressure                       | 0.57 (0.50,0.64) | <0.001   | 0.48 (0.42,0.55) | <0.001   | 0.44 (0.37,0.51) | <0.001   | 0.58 (0.51,0.64) | <0.001   |
| Diastolic blood pressure                      | 0.11 (0.06,0.16) | <0.001   | 0.08 (0.04,0.13) | <0.001   | 0.07 (0.02,0.11) | <0.001   | 0.14 (0.09,0.18) | <0.001   |
| Pulse pressure                                | 0.46 (0.40,0.51) | <0.001   | 0.40 (0.34,0.46) | <0.001   | 0.38 (0.32,0.43) | <0.001   | 0.44 (0.39,0.50) | <0.001   |

Results are changes in blood pressure for each 10-μg/m<sup>3</sup> increment in the 2-year average PM<sub>2.5</sub> concentration.

Crude Mode: no adjustment; Adjusted Model 1: adjusted by age, sex and educational level; Adjusted Model 2: also adjusted by smoking, alcohol use, physical activity, occupational exposure to dust/organic solvents and season; Adjusted Model 3: also adjusted by body mass index, hypertension (not in healthy participants), diabetes (using blood fasting glucose instead in healthy participants), hyperlipidaemia (using total cholesterol instead in healthy participants), cardiovascular disease/stroke and cancer (not in healthy participants).

a: Participants without hypertension, diabetes, hyperlipidaemia, obesity, cardiovascular disease/stroke or cancer.

Table S2 Sensitivity analysis on associations between long-term exposure to PM<sub>2.5</sub> and incident hypertension in Taiwanese adults

| PM <sub>2.5</sub> (μg/m <sup>3</sup> )                                | Crude Model      |          | Adjusted Model 1 |          | Adjusted Model 2 |          | Adjusted Model 3 |          |
|-----------------------------------------------------------------------|------------------|----------|------------------|----------|------------------|----------|------------------|----------|
|                                                                       | HR (95% CI)      | <i>P</i> |
| <b>Participants using home address (N=102,846, cases=13,555)</b>      |                  |          |                  |          |                  |          |                  |          |
| 1st Quartile (-21.4)                                                  | Ref              | -        | Ref              | -        | Ref              | -        | Ref              | -        |
| 2nd Quartile (21.4–23.8)                                              | 1.06 (1.01,1.11) | 0.01     | 1.10 (1.05,1.15) | <0.001   | 1.10 (1.05,1.15) | <0.001   | 1.10 (1.05,1.15) | <0.001   |
| 3rd Quartile (23.8–31.1)                                              | 1.10 (1.05,1.15) | <0.001   | 1.14 (1.09,1.20) | <0.001   | 1.14 (1.08,1.2)  | <0.001   | 1.12 (1.07,1.18) | <0.001   |
| 4th Quartile (31.1–)                                                  | 1.17 (1.12,1.23) | <0.001   | 1.14 (1.09,1.20) | <0.001   | 1.14 (1.09,1.2)  | <0.001   | 1.11 (1.06,1.17) | <0.001   |
| Trend test                                                            | -                | <0.001   | -                | <0.001   | -                | <0.001   | -                | <0.001   |
| 10 μg/m <sup>3</sup> increment                                        | 1.07 (1.04,1.09) | <0.001   | 1.06 (1.03,1.08) | <0.001   | 1.05 (1.03,1.08) | <0.001   | 1.04 (1.02,1.06) | <0.001   |
| <b>Healthy participants (N=80,768, cases=6,215)<sup>a</sup></b>       |                  |          |                  |          |                  |          |                  |          |
| 1st Quartile (-21.6)                                                  | Ref              | -        | Ref              | -        | Ref              | -        | Ref              | -        |
| 2nd Quartile (21.6–23.9)                                              | 1.01 (0.94,1.09) | 0.74     | 1.05 (0.98,1.12) | 0.20     | 1.05 (0.98,1.12) | 0.19     | 1.05 (0.98,1.13) | 0.17     |
| 3rd Quartile (23.9–28.6)                                              | 1.06 (0.99,1.14) | 0.10     | 1.14 (1.06,1.22) | 0.001    | 1.14 (1.06,1.22) | <0.001   | 1.13 (1.05,1.21) | 0.001    |
| 4th Quartile (28.6–)                                                  | 1.20 (1.12,1.28) | <0.001   | 1.16 (1.09,1.24) | <0.001   | 1.16 (1.08,1.24) | <0.001   | 1.17 (1.10,1.25) | <0.001   |
| Trend test                                                            | -                | <0.001   | -                | <0.001   | -                | <0.001   | -                | <0.001   |
| 10 μg/m <sup>3</sup> increment                                        | 1.08 (1.05,1.11) | <0.001   | 1.07 (1.04,1.10) | <0.001   | 1.07 (1.04,1.10) | <0.001   | 1.07 (1.04,1.11) | <0.001   |
| <b>Participants with follow-up ≥ 2 years (N=96,472, cases=12,106)</b> |                  |          |                  |          |                  |          |                  |          |
| 1st Quartile (-21.6)                                                  | Ref              | -        | Ref              | -        | Ref              | -        | Ref              | -        |
| 2nd Quartile (21.6–24.0)                                              | 1.11 (1.06,1.17) | <0.001   | 1.15 (1.09,1.21) | <0.001   | 1.15 (1.09,1.21) | <0.001   | 1.15 (1.09,1.21) | <0.001   |
| 3rd Quartile (24.0–28.9)                                              | 1.20 (1.14,1.27) | <0.001   | 1.27 (1.21,1.34) | <0.001   | 1.27 (1.21,1.34) | <0.001   | 1.25 (1.19,1.32) | <0.001   |
| 4th Quartile (28.9–)                                                  | 1.24 (1.18,1.30) | <0.001   | 1.22 (1.16,1.28) | <0.001   | 1.21 (1.16,1.27) | <0.001   | 1.18 (1.13,1.24) | <0.001   |
| Trend test                                                            | -                | <0.001   | -                | <0.001   | -                | <0.001   | -                | <0.001   |
| 10 μg/m <sup>3</sup> increment                                        | 1.08 (1.05,1.10) | <0.001   | 1.07 (1.05,1.09) | <0.001   | 1.07 (1.05,1.09) | <0.001   | 1.05 (1.03,1.08) | <0.001   |

Crude Model: no adjustment; Adjusted Model 1: adjusted by age, sex and educational level; Adjusted Model 2: also adjusted by smoking, alcohol use, physical activity, occupational exposure to dust/organic solvents and season; Adjusted Model 3: also adjusted by body mass index, diabetes (using blood fasting glucose instead in healthy participants), hyperlipidaemia (using total cholesterol instead in healthy participants), cardiovascular disease/stroke and cancer (not in healthy participants).

a: Participants without diabetes, hyperlipidaemia, obesity, cardiovascular disease/stroke or cancer.
